# Supplementary material for: A series of new polyoxometalate-based metal–organic complexes with different rigid pyridyl-bis(triazole) ligands: assembly, structures and electrochemical properties
Source: Royal Society of Chemistry journal article supplement (doi:10.1039/c8ra03277g), 2018-01-01
Supplement: c8ra03277g1.pdf [file c8ra03277g1.pdf]

**Supplementary Material (ESI) for RSC Advances**  
**This journal is © The Royal Society of Chemistry**

**A series of new polyoxometalate-based metal-organic  
complexes with different rigid pyridyl-bis(triazole) ligands:**

**Assembly, structures and electrochemical properties**

XiuLi Wang,\* Xue Bai, HongYan Lin, JunJun Sun, Xiang Wang, GuoCheng Liu

**Table S1** Selected bond distances (Å) and angles (°) for complexes 1–5.

| Complex 1         |            |                   |            |
|-------------------|------------|-------------------|------------|
| Co(1)-O(3W)       | 2.072(4)   | N(2)-Co(1)-O(2W)  | 89.76(17)  |
| Co(1)-O(1W)       | 2.091(5)   | O(3W)-Co(1)-O(1)  | 89.02(15)  |
| Co(1)-N(2)        | 2.103(4)   | O(1W)-Co(1)-O(1)  | 90.06(17)  |
| Co(1)-O(2W)       | 2.113(4)   | N(2)-Co(1)-O(1)   | 99.01(15)  |
| Co(1)-O(1)        | 2.114(4)   | O(2W)-Co(1)-O(1)  | 86.45(14)  |
| Co(1)-N(1)        | 2.139(4)   | O(3W)-Co(1)-N(1)  | 94.28(17)  |
| O(3W)-Co(1)-O(1W) | 87.5(2)    | O(1W)-Co(1)-N(1)  | 90.17(19)  |
| O(3W)-Co(1)-N(2)  | 169.81(18) | N(2)-Co(1)-N(1)   | 77.71(16)  |
| O(1W)-Co(1)-N(2)  | 98.7(2)    | O(2W)-Co(1)-N(1)  | 93.78(15)  |
| O(3W)-Co(1)-O(2W) | 84.45(16)  | O(1)-Co(1)-N(1)   | 176.70(15) |
| O(1W)-Co(1)-O(2W) | 171.25(19) |                   |            |
| Complex 2         |            |                   |            |
| Co(1)-O(2W)       | 2.046(3)   | O(2)-Co(1)-N(1)   | 92.00(16)  |
| Co(1)-O(2)        | 2.068(3)   | O(1)-Co(1)-N(1)   | 99.76(15)  |
| Co(1)-O(1)        | 2.088(3)   | O(2W)-Co(1)-O(1W) | 90.59(14)  |
| Co(1)-N(1)        | 2.118(4)   | O(2)-Co(1)-O(1W)  | 86.05(14)  |
| Co(1)-O(1W)       | 2.129(4)   | O(1)-Co(1)-O(1W)  | 83.05(14)  |
| Co(1)-N(2)        | 2.142(4)   | N(1)-Co(1)-O(1W)  | 176.60(15) |
| Co(2)-O(3W)       | 2.073(3)   | O(2W)-Co(1)-N(2)  | 89.80(15)  |
| Co(2)-O(4W)       | 2.089(4)   | O(2)-Co(1)-N(2)   | 93.53(14)  |
| Co(2)-O(3)        | 2.098(3)   | O(1)-Co(1)-N(2)   | 175.42(15) |
| Co(2)-N(8)        | 2.100(5)   | N(1)-Co(1)-N(2)   | 77.71(16)  |
| Co(2)-O(4)        | 2.115(3)   | O(1W)-Co(1)-N(2)  | 99.62(15)  |
| Co(2)-N(9)        | 2.171(4)   | O(3W)-Co(2)-O(4W) | 87.67(15)  |
| Co(3)-O(7W)       | 2.052(4)   | O(3W)-Co(2)-O(3)  | 173.51(14) |
| Co(3)-O(5W)       | 2.065(4)   | O(4W)-Co(2)-O(3)  | 87.70(14)  |
| Co(3)-O(9W)       | 2.073(4)   | O(3W)-Co(2)-N(8)  | 96.80(16)  |
| Co(3)-O(8W)       | 2.085(4)   | O(4W)-Co(2)-N(8)  | 174.47(16) |
| Co(3)-O(6W)       | 2.095(3)   | O(3)-Co(2)-N(8)   | 88.09(15)  |
| Co(3)-O(10W)      | 2.139(4)   | O(3W)-Co(2)-O(4)  | 88.03(14)  |
| O(2W)-Co(1)-O(2)  | 175.63(14) | O(4W)-Co(2)-O(4)  | 88.71(14)  |
| O(2W)-Co(1)-O(1)  | 86.44(13)  | O(3)-Co(2)-O(4)   | 87.32(13)  |
| O(2)-Co(1)-O(1)   | 90.37(13)  | N(8)-Co(2)-O(4)   | 94.68(15)  |
| O(2W)-Co(1)-N(1)  | 91.49(16)  | O(3W)-Co(2)-N(9)  | 89.57(15)  |

**Supplementary Material (ESI) for *RSC Advances***  
**This journal is © The Royal Society of Chemistry**

|                                                                                      |            |                      |            |
|--------------------------------------------------------------------------------------|------------|----------------------|------------|
| O(4W)-Co(2)-N(9)                                                                     | 98.60(15)  | O(7W)-Co(3)-O(6W)    | 86.34(15)  |
| O(3)-Co(2)-N(9)                                                                      | 95.62(14)  | O(5W)-Co(3)-O(6W)    | 92.56(15)  |
| N(8)-Co(2)-N(9)                                                                      | 78.25(16)  | O(9W)-Co(3)-O(6W)    | 175.24(16) |
| O(4)-Co(2)-N(9)                                                                      | 172.21(15) | O(8W)-Co(3)-O(6W)    | 94.50(14)  |
| O(7W)-Co(3)-O(5W)                                                                    | 91.09(17)  | O(7W)-Co(3)-O(10W)   | 95.97(16)  |
| O(7W)-Co(3)-O(9W)                                                                    | 90.45(16)  | O(5W)-Co(3)-O(10W)   | 172.89(16) |
| O(5W)-Co(3)-O(9W)                                                                    | 91.02(16)  | O(9W)-Co(3)-O(10W)   | 89.77(15)  |
| O(7W)-Co(3)-O(8W)                                                                    | 176.14(17) | O(8W)-Co(3)-O(10W)   | 87.84(14)  |
| O(5W)-Co(3)-O(8W)                                                                    | 85.11(16)  | O(6W)-Co(3)-O(10W)   | 87.07(14)  |
| O(9W)-Co(3)-O(8W)                                                                    | 88.94(15)  |                      |            |
| <b>Complex 3</b>                                                                     |            |                      |            |
| Co(1)-O(1W)                                                                          | 2.053(5)   | Co(2)-O(3W)#3        | 2.071(6)   |
| Co(1)-O(2)                                                                           | 2.085(5)   | Co(2)-O(3W)          | 2.071(6)   |
| Co(1)-O(2W)                                                                          | 2.099(5)   | Co(2)-N(1)#3         | 2.084(6)   |
| Co(1)-N(7)#1                                                                         | 2.134(7)   | Co(2)-N(1)           | 2.084(6)   |
| Co(1)-O(1)#2                                                                         | 2.135(5)   | Co(2)-N(2)#3         | 2.194(6)   |
| Co(1)-N(4)                                                                           | 2.152(7)   | Co(2)-N(2)           | 2.194(6)   |
| O(1W)-Co(1)-O(2)                                                                     | 176.8(2)   | O(3W)#3-Co(2)-O(3W)  | 180.0      |
| O(1W)-Co(1)-O(2W)                                                                    | 87.8(2)    | O(3W)#3-Co(2)-N(1)#3 | 91.0(3)    |
| O(2)-Co(1)-O(2W)                                                                     | 89.6(2)    | O(3W)-Co(2)-N(1)#3   | 89.0(3)    |
| O(1W)-Co(1)-N(7)#1                                                                   | 90.4(2)    | O(3W)#3-Co(2)-N(1)   | 89.0(3)    |
| O(2)-Co(1)-N(7)#1                                                                    | 91.7(2)    | O(3W)-Co(2)-N(1)     | 91.0(3)    |
| O(2W)-Co(1)-N(7)#1                                                                   | 99.1(2)    | N(1)#3-Co(2)-N(1)    | 180.0      |
| O(1W)-Co(1)-O(1)#2                                                                   | 87.4(2)    | O(3W)#3-Co(2)-N(2)#3 | 92.3(3)    |
| O(2)-Co(1)-O(1)#2                                                                    | 95.03(19)  | O(3W)-Co(2)-N(2)#3   | 87.7(3)    |
| O(2W)-Co(1)-O(1)#2                                                                   | 172.2(2)   | N(1)#3-Co(2)-N(2)#3  | 76.7(2)    |
| N(7)#1-Co(1)-O(1)#2                                                                  | 87.1(2)    | N(1)-Co(2)-N(2)#3    | 103.3(2)   |
| O(1W)-Co(1)-N(4)                                                                     | 97.4(2)    | O(3W)#3-Co(2)-N(2)   | 87.7(3)    |
| O(2)-Co(1)-N(4)                                                                      | 80.7(2)    | O(3W)-Co(2)-N(2)     | 92.3(3)    |
| O(2W)-Co(1)-N(4)                                                                     | 88.1(2)    | N(1)#3-Co(2)-N(2)    | 103.3(2)   |
| N(7)#1-Co(1)-N(4)                                                                    | 169.6(2)   | N(1)-Co(2)-N(2)      | 76.7(2)    |
| O(1)#2-Co(1)-N(4)                                                                    | 86.4(2)    | N(2)#3-Co(2)-N(2)    | 180.0(3)   |
| Symmetry code for <b>3</b> : #1 -x+2,-y+2,-z+1; #2 -x+1,-y+2,-z+1; #3 -x+1,-y+1,-z+1 |            |                      |            |
| <b>Complex 4</b>                                                                     |            |                      |            |
| Ni(1)-O(1W)                                                                          | 2.030(2)   | Ni(2)-N(1)#3         | 2.047(2)   |
| Ni(1)-O(2)                                                                           | 2.050(2)   | Ni(2)-N(1)           | 2.047(2)   |
| Ni(1)-O(2W)                                                                          | 2.070(2)   | Ni(2)-O(3W)          | 2.063(3)   |
| Ni(1)-N(7)#1                                                                         | 2.089(2)   | Ni(2)-O(3W)#3        | 2.063(3)   |
| Ni(1)-O(1)#2                                                                         | 2.092(2)   | Ni(2)-N(2)           | 2.154(3)   |
| Ni(1)-N(4)                                                                           | 2.110(2)   | Ni(2)-N(2)#3         | 2.154(3)   |
| O(1W)-Ni(1)-O(2)                                                                     | 177.73(9)  | O(2)-Ni(1)-N(7)#1    | 91.10(9)   |
| O(1W)-Ni(1)-O(2W)                                                                    | 88.11(9)   | O(2W)-Ni(1)-N(7)#1   | 97.62(10)  |
| O(2)-Ni(1)-O(2W)                                                                     | 90.10(9)   | O(1W)-Ni(1)-O(1)#2   | 87.46(9)   |
| O(1W)-Ni(1)-N(7)#1                                                                   | 90.52(9)   | O(2)-Ni(1)-O(1)#2    | 94.20(8)   |

|                      |            |                      |            |
|----------------------|------------|----------------------|------------|
| O(2W)-Ni(1)-O(1)#2   | 173.17(9)  | N(1)-Ni(2)-O(3W)#3   | 88.71(11)  |
| N(7)#1-Ni(1)-O(1)#2  | 87.61(9)   | O(3W)-Ni(2)-O(3W)#3  | 180.0      |
| O(1W)-Ni(1)-N(4)     | 96.92(9)   | N(1)#3-Ni(2)-N(2)    | 101.80(10) |
| O(2)-Ni(1)-N(4)      | 81.63(9)   | N(1)-Ni(2)-N(2)      | 78.20(10)  |
| O(2W)-Ni(1)-N(4)     | 88.31(10)  | O(3W)-Ni(2)-N(2)     | 91.80(11)  |
| N(7)#1-Ni(1)-N(4)    | 170.66(10) | O(3W)#3-Ni(2)-N(2)   | 88.20(11)  |
| O(1)#2-Ni(1)-N(4)    | 87.08(9)   | N(1)#3-Ni(2)-N(2)#3  | 78.20(10)  |
| N(1)#3-Ni(2)-N(1)    | 180.0      | N(1)-Ni(2)-N(2)#3    | 101.79(10) |
| N(1)#3-Ni(2)-O(3W)   | 88.71(11)  | O(3W)-Ni(2)-N(2)#3   | 88.20(11)  |
| N(1)-Ni(2)-O(3W)     | 91.29(10)  | O(3W)#3-Ni(2)-N(2)#3 | 91.80(11)  |
| N(1)#3-Ni(2)-O(3W)#3 | 91.29(10)  |                      |            |

Symmetry code for **4**: #1 -x+2,-y+2,-z+1; #2 -x+1,-y+2,-z+1; #3 -x+1,-y+1,-z+1

Complex **5**

|                    |            |                      |            |
|--------------------|------------|----------------------|------------|
| Ni(1)-O(1W)        | 2.000(3)   | Ni(2)-N(3)#2         | 2.055(3)   |
| Ni(1)-O(2W)        | 2.039(3)   | Ni(2)-N(4)#2         | 2.057(3)   |
| Ni(1)-N(1)         | 2.054(3)   | Ni(2)-O(6W)#2        | 2.092(3)   |
| Ni(1)-O(8)         | 2.069(2)   | Ni(2)-O(6W)          | 2.092(3)   |
| Ni(1)-O(3W)        | 2.072(2)   | Ni(2)-N(4)           | 2.057(3)   |
| Ni(1)-O(1)#1       | 2.082(2)   | Ni(2)-N(3)           | 2.055(3)   |
| O(1W)-Ni(1)-O(2W)  | 180.0      | N(3)#2-Ni(2)-N(3)    | 180.0      |
| O(1W)-Ni(1)-N(1)   | 100.97(12) | N(3)#2-Ni(2)-N(4)    | 100.97(12) |
| O(2W)-Ni(1)-N(1)   | 79.03(12)  | N(3)-Ni(2)-N(4)      | 79.03(12)  |
| O(1W)-Ni(1)-O(8)   | 79.03(12)  | N(3)#2-Ni(2)-N(4)#2  | 79.03(12)  |
| O(2W)-Ni(1)-O(8)   | 100.97(12) | N(3)-Ni(2)-N(4)#2    | 100.97(12) |
| N(1)-Ni(1)-O(8)    | 180.0      | N(4)-Ni(2)-N(4)#2    | 180.0      |
| O(1W)-Ni(1)-O(3W)  | 86.68(13)  | N(3)#2-Ni(2)-O(6W)   | 86.68(13)  |
| O(2W)-Ni(1)-O(3W)  | 93.32(13)  | N(3)-Ni(2)-O(6W)     | 93.32(13)  |
| N(1)-Ni(1)-O(3W)   | 91.80(15)  | N(4)-Ni(2)-O(6W)     | 91.80(15)  |
| O(8)-Ni(1)-O(3W)   | 88.20(15)  | N(4)#2-Ni(2)-O(6W)   | 88.20(15)  |
| O(1W)-Ni(1)-O(1)#1 | 93.32(13)  | N(3)#2-Ni(2)-O(6W)#2 | 93.32(13)  |
| O(2W)-Ni(1)-O(1)#1 | 86.68(13)  | N(3)-Ni(2)-O(6W)#2   | 86.68(13)  |
| N(1)-Ni(1)-O(1)#1  | 88.20(15)  | N(4)-Ni(2)-O(6W)#2   | 88.20(15)  |
| O(8)-Ni(1)-O(1)#1  | 91.80(15)  | N(4)#2-Ni(2)-O(6W)#2 | 91.80(15)  |
| O(3W)-Ni(1)-O(1)#1 | 180.0      | O(6W)-Ni(2)-O(6W)#2  | 180.0      |

Symmetry code for **5**: #1 -x,-y,-z+2; #2 -x,-y+1,-z+2

**Table S2.** Selected hydrogen-bonding geometry (Å, °) for complexes **1–2**

| Complex  | D–H...A              | D–H  | H...A | D...A  | D–H...A |
|----------|----------------------|------|-------|--------|---------|
| <b>1</b> | C(3)–H(3A)···O(10)   | 0.86 | 1.98  | 3.2540 | 143     |
|          | N(6)–H(6A)···O(8)    | 0.93 | 2.46  | 2.7150 | 143     |
| <b>2</b> | N(3)–H(3A)···O(7)    | 0.86 | 1.90  | 2.7170 | 157     |
|          | C(18)–H(18A)···O(17) | 0.93 | 2.16  | 3.0100 | 151     |

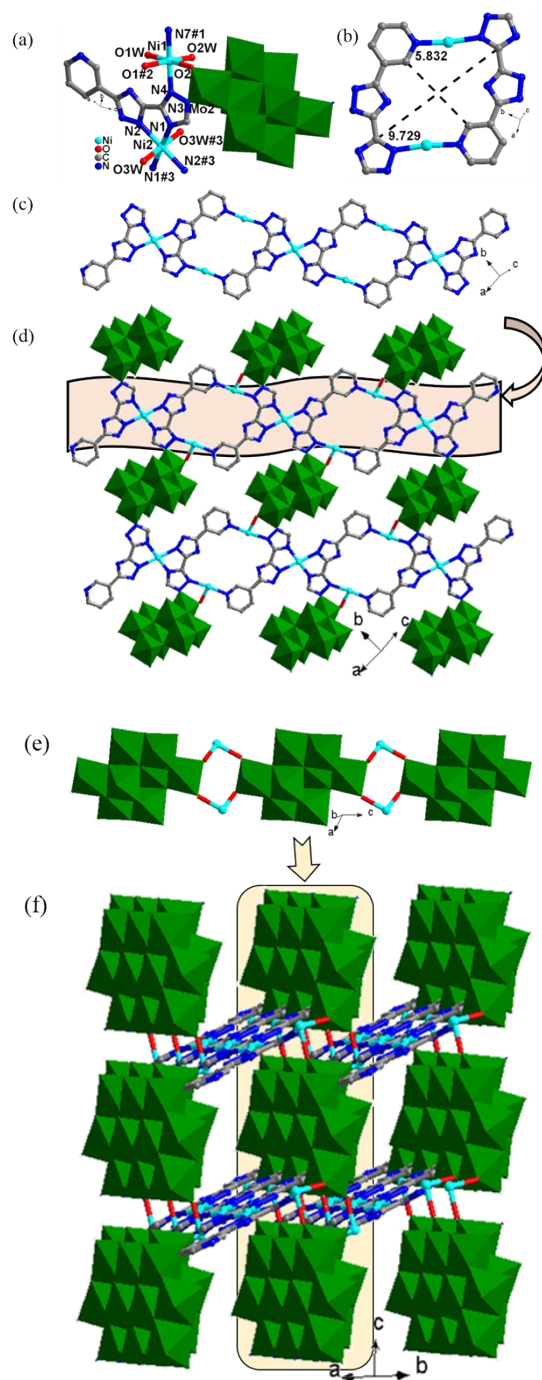

**Fig. S1** (a) The coordination geometry of the Ni<sup>II</sup> ions in **4**. The hydrogen atoms and lattice water molecules are omitted for clarity; Symmetry code for **4**: #1 -x+2,-y+2,-z+1; #2 -x+1,-y+2,-z+1; #3 -x+1,-y+1,-z+1. (b) [Ni<sub>2</sub>(H<sub>2</sub>pyttz-II)<sub>2</sub>] loop in **4**. (c) The 1D Co-H<sub>2</sub>pyttz-II chain in **4**. (d) View of the 2D layer in **4**. (e) A view of Ni-γ-Mo<sub>8</sub>O<sub>26</sub> inorganic chain in complex **4**. (f) The 3D Mo<sub>8</sub>O<sub>26</sub>-based metal-organic framework of **4**.

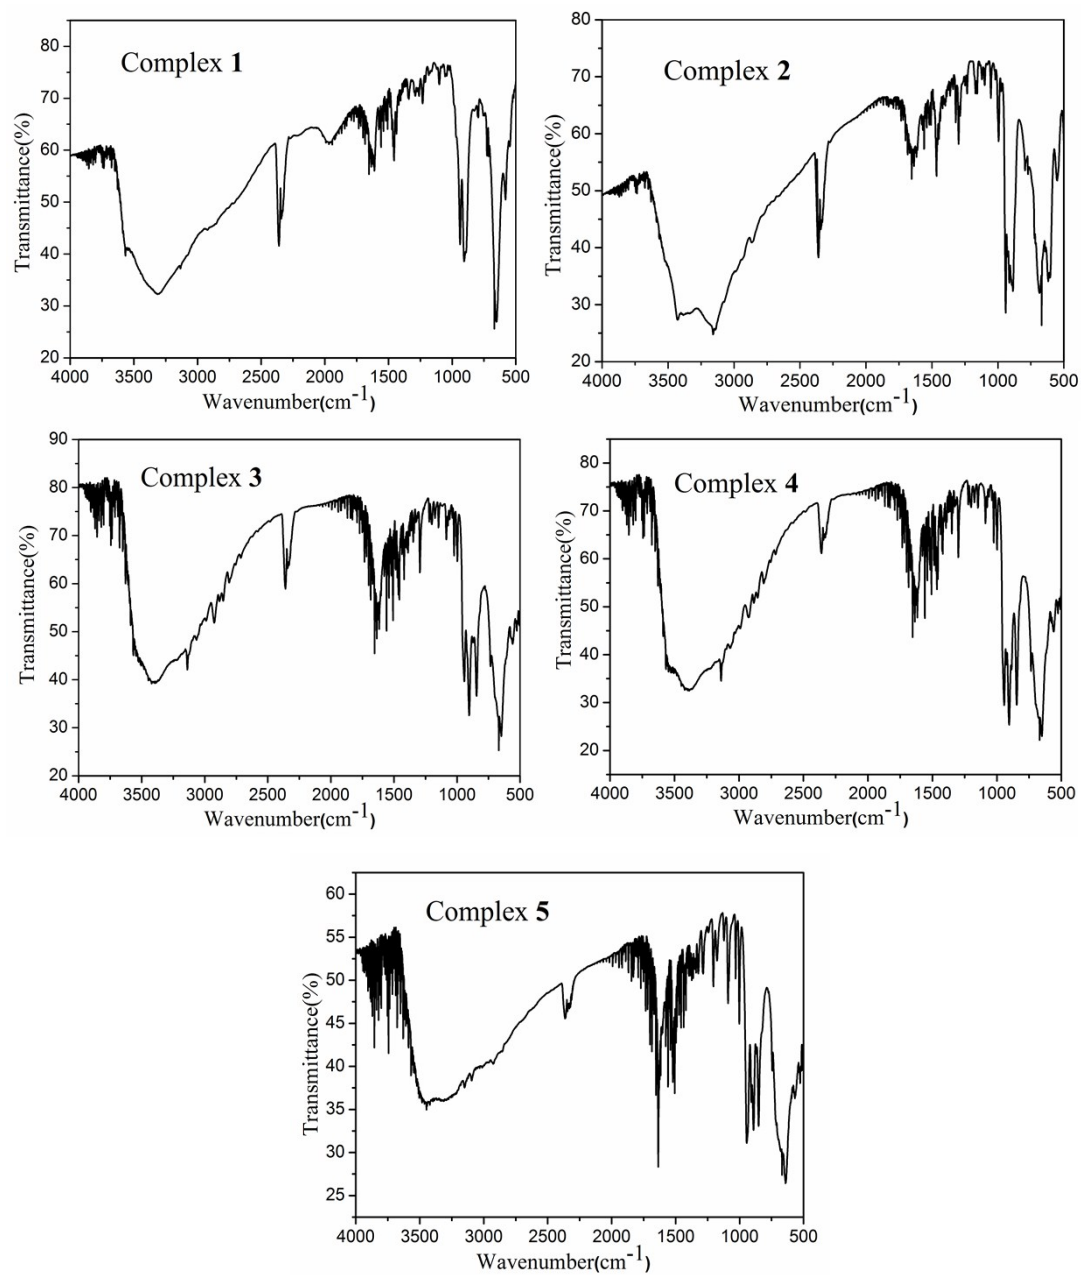

**Fig. S2** The IR spectra of complexes 1–5.

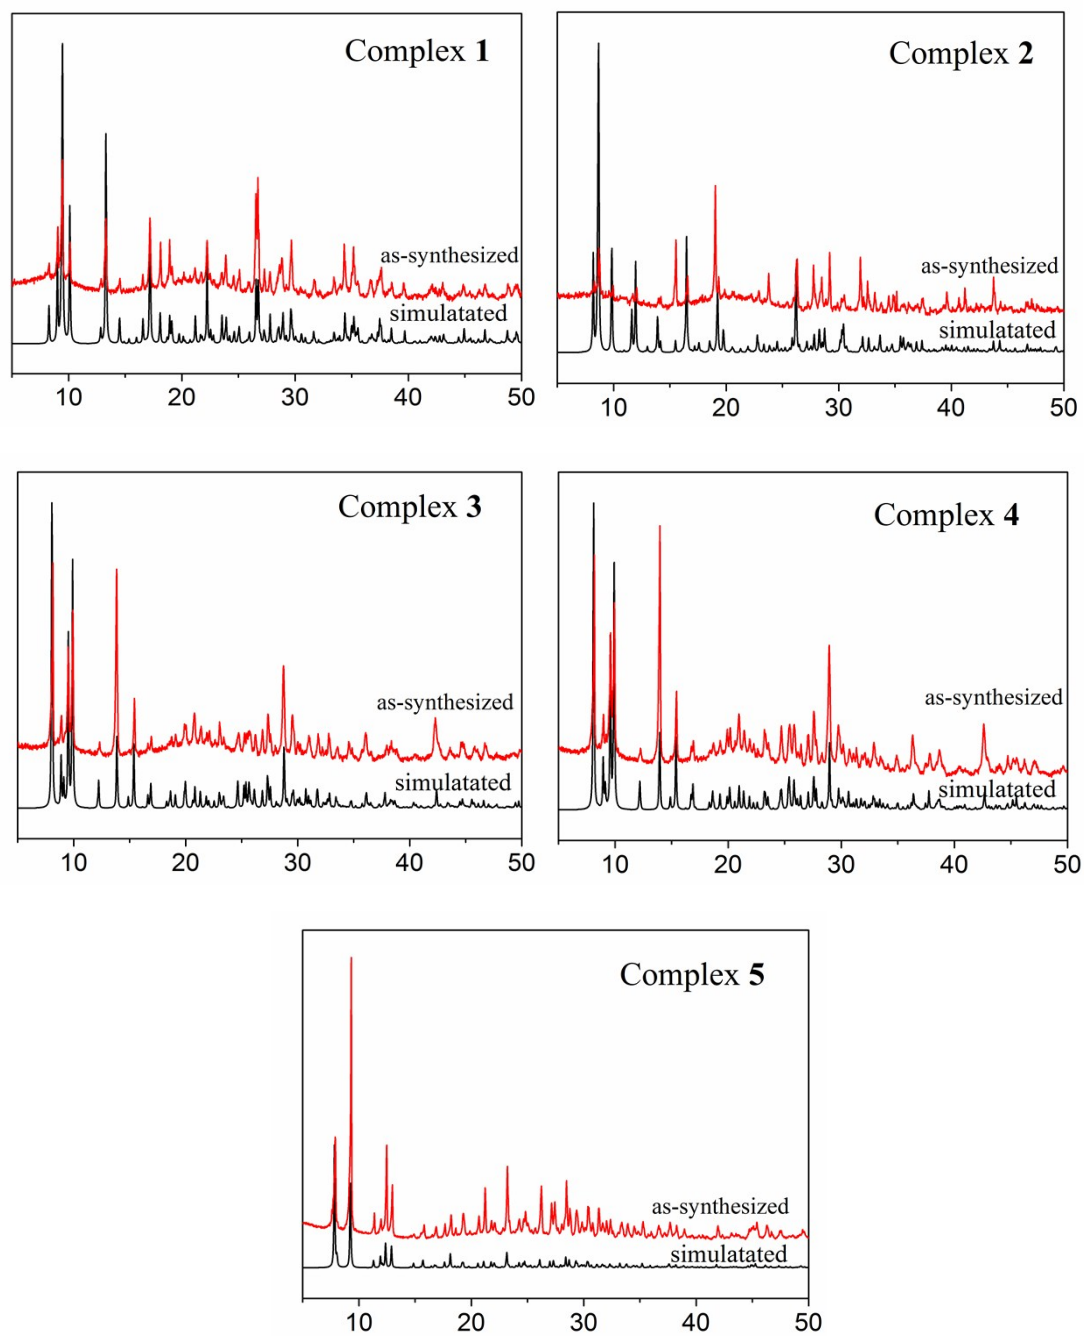

**Fig. S3** The PXRD patterns of complexes 1–5.

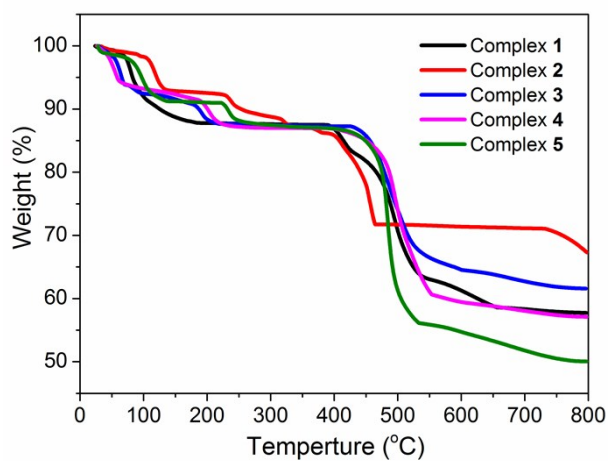

Fig. S4 The TG curves of complexes 1–5.

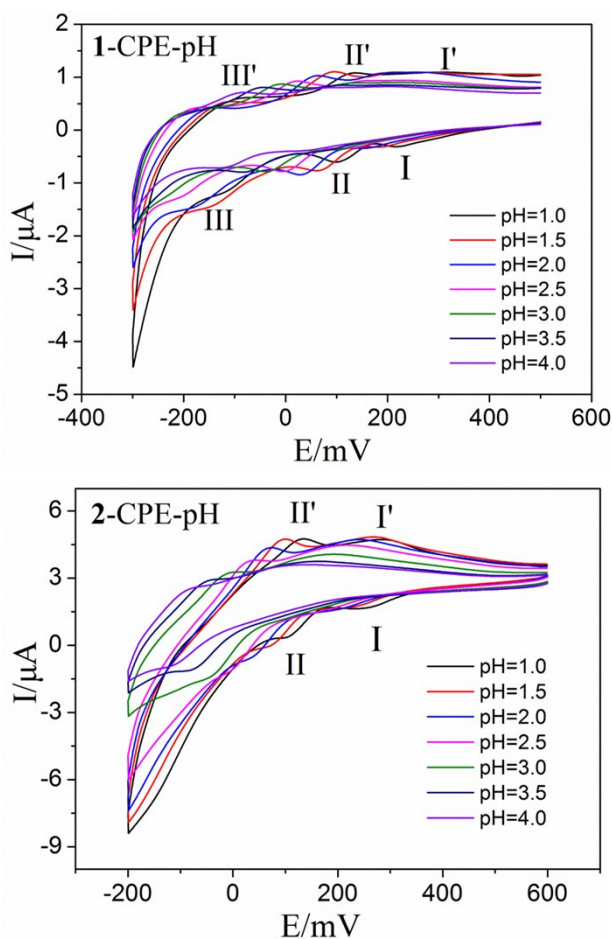

Fig. S5 Cyclic voltammograms of 1-CPE and 2-CPE at different pH values (Scan rate:  $40 \text{ mV} \cdot \text{s}^{-1}$ ).

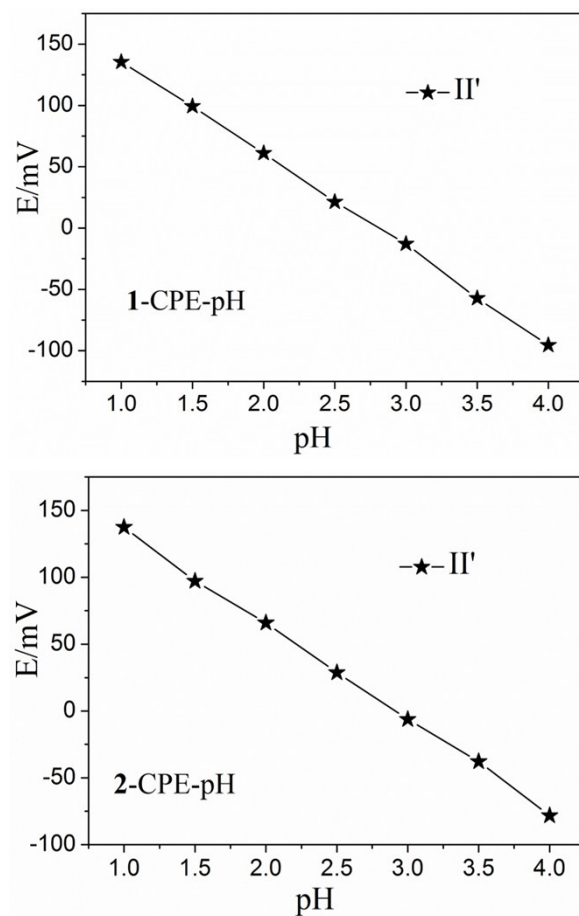

**Fig. S6** Variation of anodic peak potentials of the  $Mo^{VI}$ -based wave (II') with different pH for 1-CPE and 2-CPE
